# Supplementary material for: Comparison of Ketogenic Diets with and without Ketone Salts versus a Low-Fat Diet: Liver Fat Responses in Overweight Adults
Source: PubMed Central journal article supplement (PMC8002465; doi:10.3390/nu13030966), 2021-03-17
Supplement: nutrients-13-00966-s001.pdf [file nutrients-13-00966-s001.pdf]

**Supplementary Table S1.** Example daily meal plan.

| Ketogenic Diet                                                    |  | Weight    | High Carbohydrate                |  | Weight.   |
|-------------------------------------------------------------------|--|-----------|----------------------------------|--|-----------|
| Breakfast (Peanut Butter Cup Shake)                               |  |           | Breakfast (Oatmeal)              |  |           |
| Chocolate Ketogenic shake (fat and protein)<br>(Metagenics, Inc.) |  | (54.0 g)  | Old Fashion oats                 |  | (50.0 g)  |
| Heavy cream                                                       |  | (10.0 g)  | Chia seed                        |  | (3.0 g)   |
| Almond milk                                                       |  | (240.0 g) | Banana                           |  | (75.0 g)  |
| Peanut butter                                                     |  | (32.0 g)  | Dates                            |  | (30.0 g)  |
| MCT oil                                                           |  | (10.0 g)  | Peanut butter                    |  | (15.0 g)  |
|                                                                   |  |           | Cinnamon, Ground                 |  | (1.0 g)   |
|                                                                   |  |           | Raisins                          |  | (20.0 g)  |
|                                                                   |  |           | Skim milk                        |  | (350.0 g) |
| Lunch (Dijon Salmon w/ Broccoli)                                  |  |           | Lunch (Dijon Salmon w/Veggies)   |  |           |
| Salmon                                                            |  | (110.0 g) | Salmon                           |  | (115.0 g) |
| Olive oil                                                         |  | (7.8 g)   | Olive oil                        |  | (2.0 g)   |
| Parmesan cheese                                                   |  | (5.0 g)   | Parmesan cheese                  |  | (5.0 g)   |
| Dijon mustard                                                     |  | (5.0 g)   | Dijon mustard                    |  | (5.0 g)   |
| Lemon juice                                                       |  | (2.0 g)   | Lemon juice                      |  | (2.0 g)   |
| Broccoli                                                          |  | (95.0 g)  | Broccoli                         |  | (95.0 g)  |
| Parmesan cheese                                                   |  | (5.0 g)   | Lite butter                      |  | (3.0 g)   |
| Butter, Unsalted                                                  |  | (5.7 g)   | Mashed sweet potatoes            |  | (180.0 g) |
| Afternoon Snack                                                   |  |           | Afternoon Snack                  |  |           |
| MCT oil                                                           |  | (10.0 g)  | Apple slices                     |  | (100.0 g) |
| Chicken bouillon                                                  |  | (2.5 g)   | Popcorn                          |  | (18.0 g)  |
| Almonds                                                           |  | (30.0 g)  | Vanilla yogurt                   |  | (227.0 g) |
| Sugar free Jello                                                  |  | (96.0 g)  |                                  |  |           |
| Cheddar cheese cubes                                              |  | (43.0 g)  |                                  |  |           |
| Dinner (Zoodle Chicken Alfredo)                                   |  |           | Dinner (Chicken Fajitas w/ Rice) |  |           |
| Zucchini noodles                                                  |  | (200.0 g) | Fajita roasted chicken           |  | (99.0 g)  |
| Butter                                                            |  | (5.0 g)   | Peppers & onion                  |  | (110.0 g) |
| Heavy cream                                                       |  | (58.0 g)  | Sour Cream                       |  | (24.0 g)  |
| Cream cheese                                                      |  | (25.0 g)  | Salsa                            |  | (60.0 g)  |
| Pesto                                                             |  | (10.0 g)  | Whole wheat tortilla             |  | (45.0 g)  |
| Parmesan cheese                                                   |  | (5.0 g)   | Corn                             |  | (60.0 g)  |
| Roasted chicken                                                   |  | (90.0 g)  | Black beans & brown rice         |  | (110.0 g) |

**Supplementary Table S2.** MRI sequence parameters.

|                         | Field Strength | Total Slice | Acquisition Time | Repetition Time (TR) | Echo Time (TE) | Flip Angle | Slice Thickness | Slice Coverage | FOV <sub>x</sub> | FOV <sub>y</sub> |
|-------------------------|----------------|-------------|------------------|----------------------|----------------|------------|-----------------|----------------|------------------|------------------|
|                         | (T)            | (#)         | (s)              | (ms)                 | (ms)           | (degrees)  | (mm)            | (mm)           | (mm)             | (mm)             |
| Fat Imaging (Abdominal) | 3 Tesla        | 64          | 18               | 9.06                 | 1.2            | 4          | 4.8             | 307            | 282-390          | 418-500          |

FOV = field of view.

**Supplementary Table S3.** Liver lobe fat % distribution and change.

| Segment        | Diet    | Timepoint |   |      |      |      |       | 3 × 2 ANOVA Effects |      |      |
|----------------|---------|-----------|---|------|------|------|-------|---------------------|------|------|
|                |         | WK0       |   | WK6  |      | Time | Group | Group*Time          |      |      |
| Superior Lobes |         |           |   |      |      |      |       |                     |      |      |
| 1              | KD + KS | 4.75      | ± | 1.10 | 2.74 | ±    | 0.41  | 0.005*              | 0.16 | 0.73 |
|                | KD + PL | 5.66      | ± | 1.56 | 3.69 | ±    | 0.59  |                     |      |      |
|                | LFD     | 3.93      | ± | 0.70 | 1.96 | ±    | 0.33  |                     |      |      |
| 2              | KD + KS | 4.52      | ± | 1.10 | 2.91 | ±    | 0.49  | 0.016*              | 0.13 | 0.65 |

|                |         |      |   |      |      |   |      |               |      |      |
|----------------|---------|------|---|------|------|---|------|---------------|------|------|
|                | KD + PL | 5.73 | ± | 1.90 | 3.85 | ± | 0.64 |               |      |      |
|                | LFD     | 3.67 | ± | 0.69 | 2.01 | ± | 0.20 |               |      |      |
| 4a             | KD + KS | 4.93 | ± | 1.26 | 1.96 | ± | 0.42 | <b>0.001*</b> | 0.23 | 0.61 |
|                | KD + PL | 5.53 | ± | 1.65 | 3.75 | ± | 0.73 |               |      |      |
|                | LFD     | 3.95 | ± | 0.69 | 1.89 | ± | 0.49 |               |      |      |
| 8              | KD + KS | 5.21 | ± | 1.25 | 2.70 | ± | 0.68 | <b>0.003*</b> | 0.33 | 0.82 |
|                | KD + PL | 5.96 | ± | 2.01 | 4.13 | ± | 0.81 |               |      |      |
|                | LFD     | 4.71 | ± | 0.93 | 2.16 | ± | 0.55 |               |      |      |
| 7              | KD + KS | 4.58 | ± | 1.58 | 3.44 | ± | 0.85 | <b>0.009*</b> | 0.39 | 0.66 |
|                | KD + PL | 5.76 | ± | 1.97 | 3.69 | ± | 0.75 |               |      |      |
|                | LFD     | 4.22 | ± | 0.91 | 2.08 | ± | 0.44 |               |      |      |
| Inferior Lobes |         |      |   |      |      |   |      |               |      |      |
| 3              | KD + KS | 4.68 | ± | 1.29 | 2.89 | ± | 0.62 | <b>0.004*</b> | 0.19 | 0.71 |
|                | KD + PL | 5.87 | ± | 1.79 | 3.73 | ± | 0.67 |               |      |      |
|                | LFD     | 4.08 | ± | 0.74 | 2.08 | ± | 0.36 |               |      |      |
| 4b             | KD + KS | 5.01 | ± | 1.43 | 2.42 | ± | 0.60 | <b>0.005*</b> | 0.43 | 0.88 |
|                | KD + PL | 5.92 | ± | 1.91 | 3.74 | ± | 0.64 |               |      |      |
|                | LFD     | 4.83 | ± | 1.07 | 2.06 | ± | 0.52 |               |      |      |
| 5              | KD + KS | 4.71 | ± | 1.04 | 2.65 | ± | 0.70 | <b>0.011*</b> | 0.26 | 0.78 |
|                | KD + PL | 5.42 | ± | 2.08 | 3.93 | ± | 0.89 |               |      |      |
|                | LFD     | 4.16 | ± | 0.95 | 1.99 | ± | 0.59 |               |      |      |
| 6              | KD + KS | 4.34 | ± | 1.31 | 3.08 | ± | 0.89 | <b>0.007*</b> | 0.31 | 0.80 |
|                | KD + PL | 5.39 | ± | 1.85 | 3.70 | ± | 0.75 |               |      |      |
|                | LFD     | 3.70 | ± | 0.76 | 1.75 | ± | 0.38 |               |      |      |

Values reported as mean ± SEM. \* =  $p < 0.05$  (indicated in bold).

**Supplementary Table S4.** Pearson Correlations between Liver Fat and Serum Biomarkers/Anthropometric Changes in combined NAFLD subgroup ( $n = 12$ ).

| Category                                 | R      | <i>p</i> -Value |
|------------------------------------------|--------|-----------------|
| Serum                                    |        |                 |
| AST (U/L)                                | -0.055 | 0.86            |
| ALT (U/L)                                | 0.027  | 0.93            |
| AST/ALT                                  | -0.004 | 0.99            |
| HOMA-IR                                  | 0.455  | 0.14            |
| Bilirubin (U/L)                          | 0.075  | 0.82            |
| ALP (U/L)                                | 0.157  | 0.63            |
| Albumin (mg/dL)                          | 0.175  | 0.59            |
| Glucose (mg/dL)                          | -0.188 | 0.56            |
| Ketones (mmol/L BHB)                     | -0.037 | 0.91            |
| HSI                                      | 0.157  | 0.63            |
| Anthropometry                            |        |                 |
| Weight (kg)                              | 0.338  | 0.28            |
| DEXA FM (kg)                             | 0.264  | 0.41            |
| RMR (kcal/day)                           | 0.321  | 0.34            |
| RER (VCO <sub>2</sub> /VO <sub>2</sub> ) | 0.165  | 0.61            |

Values in bold face and \* =  $p < 0.05$ . AST = aspartate aminotransferase; ALT = alanine aminotransferase; ALP = alkaline phosphatase; HOMA-IR = HOMEostatic Assessment model of Insulin Resistance; DXA = dual-energy x-ray absorptiometry; RMR = resting metabolic rate; RER = respiratory exchange ratio.
